# Supplementary material for: In situ injectable NIR-responsive supramolecular hydrogels encapsulating ROS-triggered chain-breakage prodrug micelles and hydrophilic Fe3O4 nanoparticles for enhanced synergistic chemo-photothermal therapy
Source: Royal Society of Chemistry journal article supplement (doi:10.1039/d3tb00248a), 2023-01-01
Supplement: d3tb00248a1.pdf [file d3tb00248a1.pdf]

Electronic Supplementary Information for:

**In situ injectable NIR-responsive supramolecular hydrogels  
encapsulating ROS-triggered chain-breakage prodrug  
micelles and hydrophilic Fe<sub>3</sub>O<sub>4</sub> nanoparticles for enhanced  
synergistic chemo-photothermal therapy**

*Shiwei Huang, Nuoya Zhao, Zhiyi Qian and Weizhong Yuan\**

*School of Materials Science and Engineering, Key Laboratory of Advanced Civil  
Materials of Ministry of Education, Tongji University, Shanghai 201804, People's  
Republic of China*

\* Corresponding author.

E-mail address: [yuanwz@tongji.edu.cn](mailto:yuanwz@tongji.edu.cn) (W.Z. Yuan).

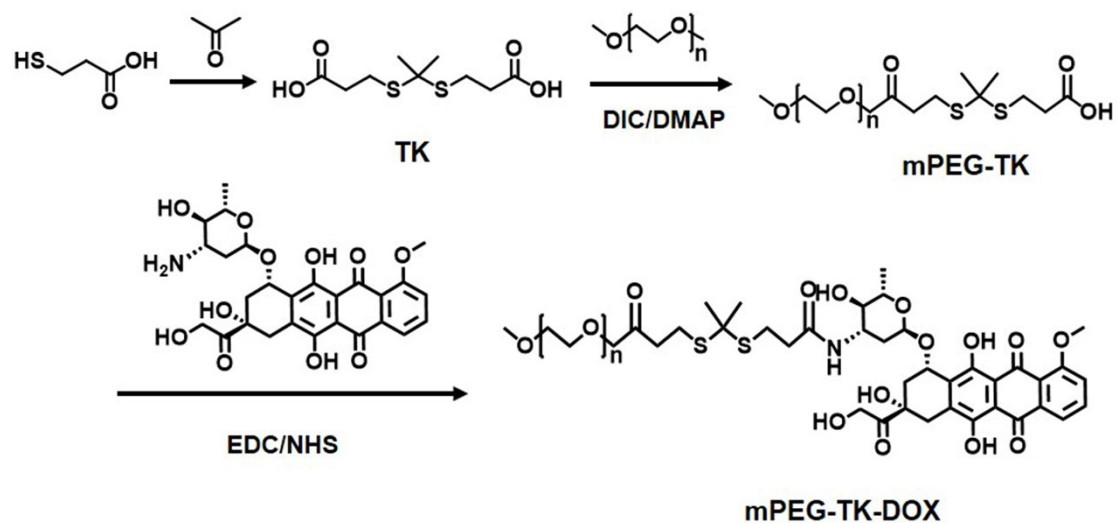

Fig. S1. Synthetic scheme for mPEG-TK-DOX.

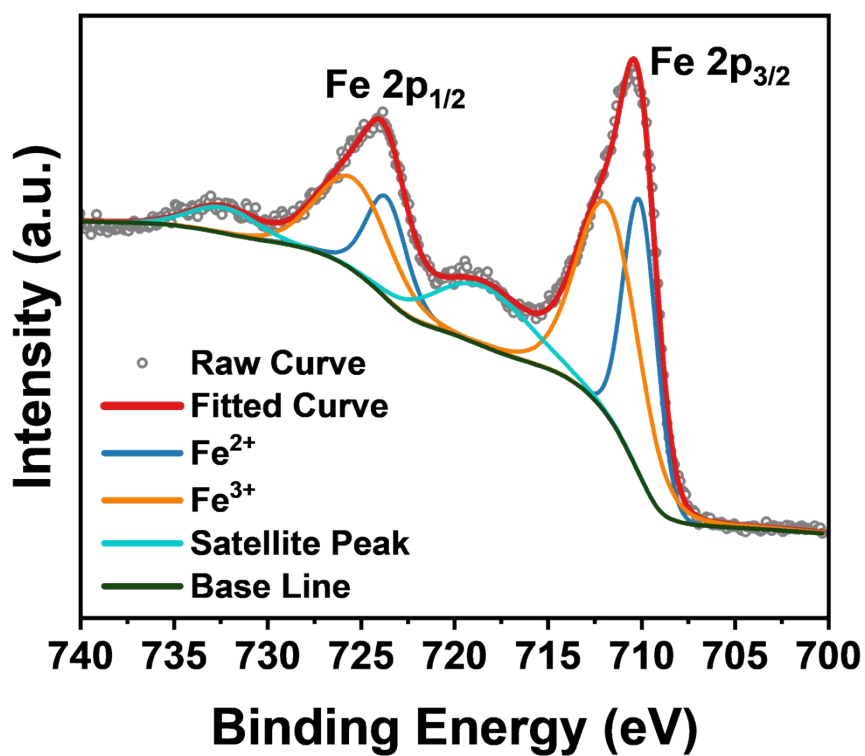

Fig. S2. The XPS spectrum of PEG/PEI@ $\text{Fe}_3\text{O}_4$  NPs.

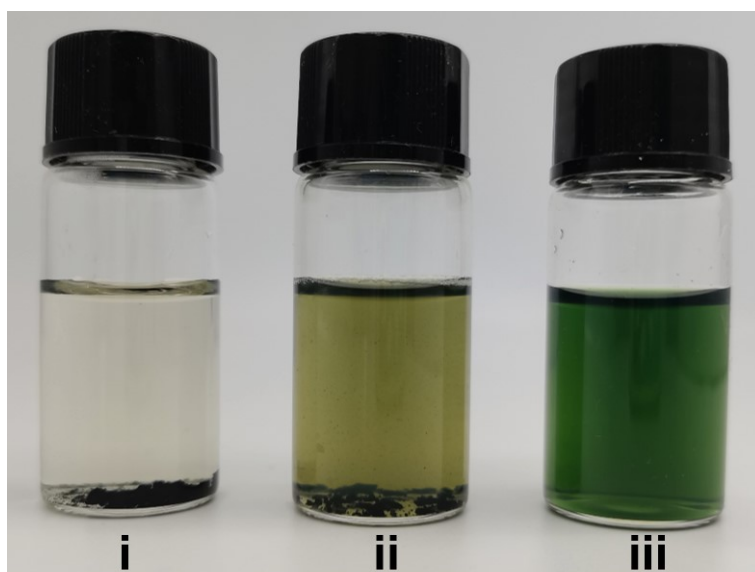

**Fig. S3.** Digital photos of (i) PNPG, (ii) PNPG+PEG, and (iii) PNPG-PEG composite in water. The PNPG polymer showed poor dispersibility and formed precipitation in both water and PEG solution. In contrast, the PNPG-PEG composite was highly water-soluble.

**Table S1.** Preparation of PNPG-PEG/ $\alpha$ -CD supramolecular hydrogel.

| Sample | PNPG-PEG (mg/ml) | $\alpha$ -CD (mg/ml) | Gelation time (min) | $T_{\text{sol-gel}}$ ( $^{\circ}\text{C}$ ) | Regelation time (min) |
|--------|------------------|----------------------|---------------------|---------------------------------------------|-----------------------|
| 1      | 35               | 145                  | 12                  | 53                                          | 15                    |
| 2      | 35               | 155                  | 8                   | 55                                          | 10                    |
| 3      | 35               | 165                  | 4                   | 58                                          | 5                     |

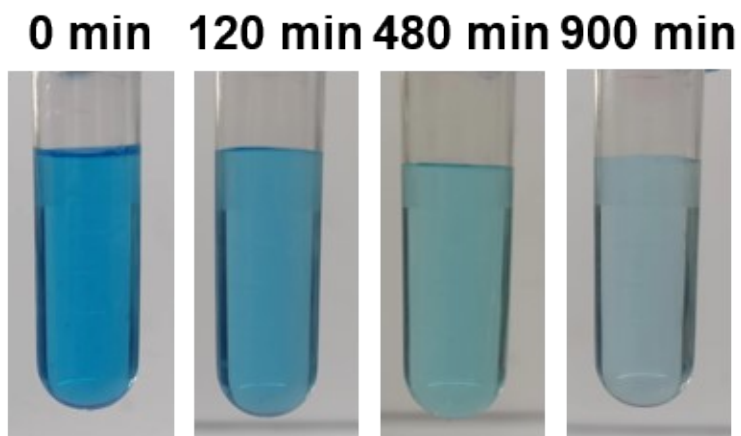

**Fig. S4.** Digital photos of MB degradation profile after incubating with H<sub>2</sub>O<sub>2</sub> plus PEG/PEI@Fe<sub>3</sub>O<sub>4</sub> NPs at 45°C.

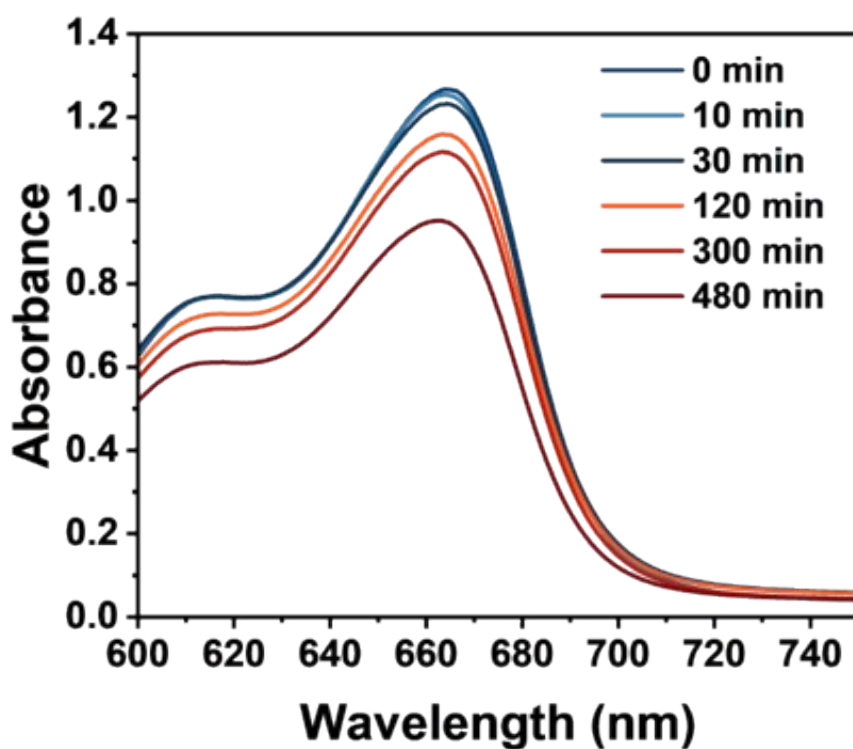

**Fig. S5.** UV absorption spectra of MB degradation at different time after incubating with H<sub>2</sub>O<sub>2</sub> plus PEG/PEI@Fe<sub>3</sub>O<sub>4</sub> NPs at 37 °C.

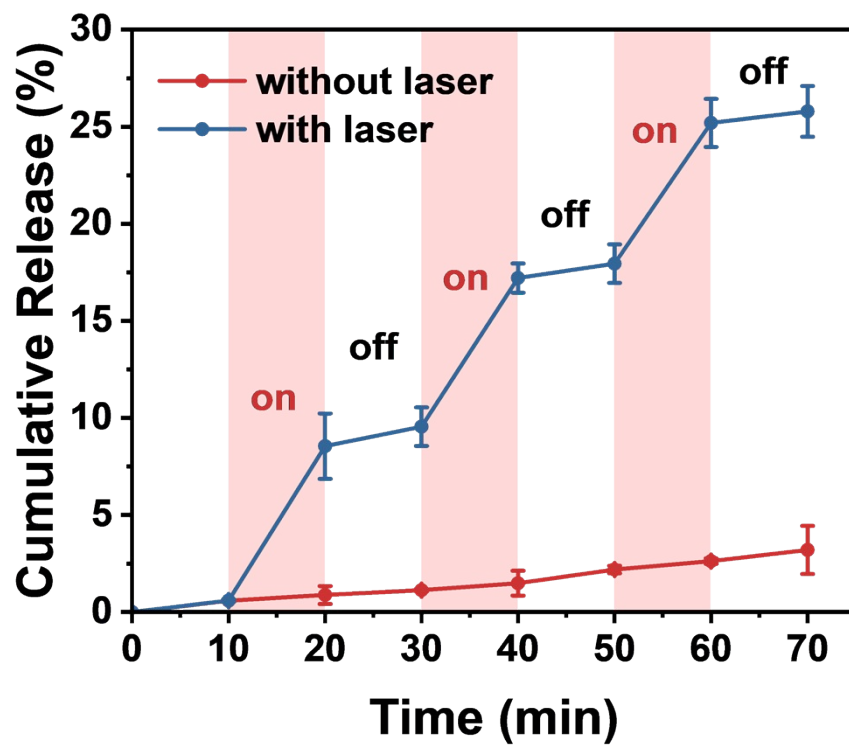

Fig. S6. Cumulative DOX release curves from composite hydrogels with ( $1.0 \text{ W/cm}^2$ ) or without NIR laser irradiation.

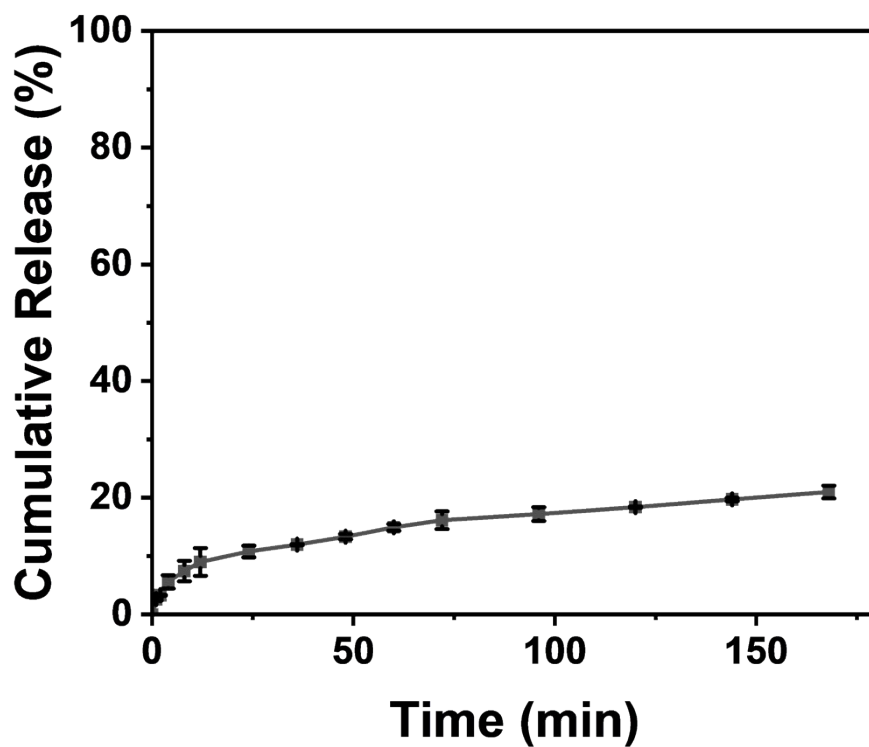

Fig. S7. The long-term cumulative DOX release curves from composite hydrogels without NIR laser irradiation.

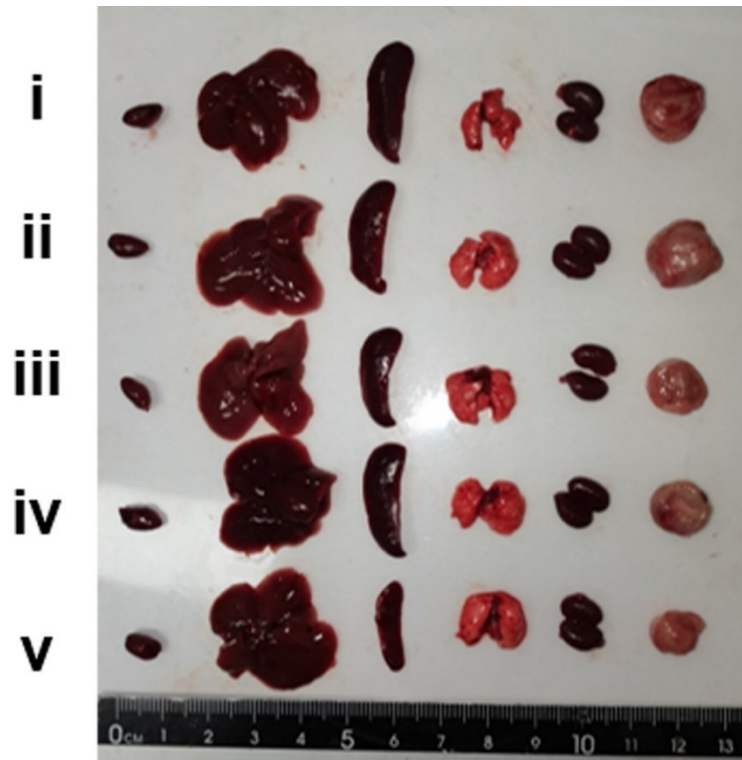

**Fig. S8.** Digital photos of tumors and major organs of mice under different treatments (i-v: PBS, Gel, Gel+NIR, Gel+M+NIR, Gel+M+Fe+NIR).
